# Supplementary material for: Care-seeking during fatal childhood illness in rural South Africa: a qualitative study
Source: HighWire-hosted journal article supplement (doi:10.1136/bmjopen-2020-043652), 2021-04-01
Supplement: bmjopen-2020-043652supp002_data_supplement.pdf [file bmjopen-2020-043652supp002_data_supplement.pdf]

Supplementary material: Table S2: Individual participant characteristics

| Participant ID | Method: IDI or FGD <sup>‡</sup> | Age group of child who died | Respondent's relationship to deceased child | Place of death  | Cause of death                                | Household socio-economic quintile (1=poorest, 5=least poor) | Sought healthcare outside the home | Used traditional medicine or consulted a traditional healer for child's final illness |
|----------------|---------------------------------|-----------------------------|---------------------------------------------|-----------------|-----------------------------------------------|-------------------------------------------------------------|------------------------------------|---------------------------------------------------------------------------------------|
| 1              | IDI                             | 1-11 months                 | Mother                                      | Home            | Acute respiratory infection                   | 4                                                           | Yes                                | No                                                                                    |
| 2              | IDI                             | 1-11 months                 | Mother                                      | Home            | Acute respiratory infection                   | 3                                                           | No                                 | No                                                                                    |
| 3              | IDI                             | 1-4 years                   | Grandmother                                 | Home            | Unknown                                       | 5                                                           | Yes                                | No                                                                                    |
| 4              | IDI                             | 1-4 years                   | Grandmother                                 | Health facility | Other and unspecified external cause of death | 5                                                           | Yes                                | No                                                                                    |
| 5              | IDI                             | 1-11 months                 | Grandmother                                 | Health facility | Acute respiratory infection                   | 2                                                           | Yes                                | No                                                                                    |
| 6              | IDI                             | Neonatal                    | Grandmother                                 | Health facility | Acute respiratory infection                   | 1                                                           | Yes                                | No                                                                                    |
| 7              | IDI                             | 1-4 years                   | Mother                                      | Health facility | Acute abdomen                                 | 3                                                           | Yes                                | No                                                                                    |
| 8**            | IDI                             | Neonatal                    | Father                                      | On route        | Neonatal sepsis                               | 1                                                           | Yes                                | Yes                                                                                   |
| 9              | IDI                             | 1-11 months                 | Father                                      | Health facility | Acute respiratory infection                   | 3                                                           | Yes                                | No                                                                                    |
| 10             | IDI                             | 1-4 years                   | Mother                                      | Home            | Burns                                         | 1                                                           | Yes                                | No                                                                                    |
| 11             | IDI                             | 1-11 months                 | Mother                                      | Home            | Unknown                                       | 1                                                           | No                                 | No                                                                                    |
| 12             | IDI                             | 1-4 years                   | Aunt                                        | Health facility | Unknown                                       | 1                                                           | Yes                                | No                                                                                    |
| 13**           | IDI                             | 1-11 months                 | Mother                                      | Home            | Unknown                                       | 2                                                           | No                                 | No                                                                                    |
| 14             | IDI                             | 1-11 months                 | Mother                                      | Health facility | Acute respiratory infection                   | 2                                                           | Yes                                | No                                                                                    |
| 15             | IDI                             | 1-11 months                 | Mother                                      | Health facility | Acute respiratory infection                   | 3                                                           | Yes                                | No                                                                                    |
| 16             | FGD                             | 1-4 years                   | Grandmother                                 | Health facility | Burns                                         | 2                                                           | Yes                                | No                                                                                    |
| 17             | FGD                             | 1-4 years                   | Aunt                                        | Health facility | Acute abdomen                                 | 1                                                           | Yes                                | No*                                                                                   |
| 18             | FGD                             | 1-11 months                 | Mother                                      | Health facility | Acute respiratory infection                   | 1                                                           | Yes                                | No                                                                                    |
| 19             | FGD                             | Neonatal                    | Mother                                      | Health facility | Birth Asphyxia                                | 2                                                           | Yes                                | No                                                                                    |
| 20             | IDI                             | Neonatal                    | Mother                                      | Health facility | Birth asphyxia                                | 2                                                           | Yes                                | No                                                                                    |
| 21             | IDI                             | 1-11 months                 | Mother                                      | Home            | Meningitis or Encephalitis                    | 4                                                           | No                                 | No                                                                                    |
| 22             | IDI                             | 1-4 years                   | Mother                                      | Health facility | Unknown                                       | 3                                                           | Yes                                | No                                                                                    |
| 23             | IDI                             | 1-11 months                 | Mother                                      | Health facility | Meningitis or Encephalitis                    | 4                                                           | Yes                                | No                                                                                    |
| 24             | IDI                             | 1-4 years                   | Mother                                      | Home            | Unknown                                       | 4                                                           | Yes                                | No                                                                                    |
| 25             | IDI                             | 1-4 years                   | Mother                                      | Home            | Diarrhoeal disease                            | 4                                                           | Yes                                | No                                                                                    |
| 26             | IDI                             | 1-4 years                   | Mother                                      | Home            | Unknown                                       | 2                                                           | Yes                                | No                                                                                    |
| 27             | IDI                             | Neonatal                    | Mother                                      | Health facility | Acute respiratory infection                   | 4                                                           | Yes                                | No                                                                                    |

| Participant ID | Method: IDI or FGD <sup>†</sup> | Age group of child who died | Respondent's relationship to deceased child | Place of death  | Cause of death              | Household socio-economic quintile (1=poorest, 5=least poor) | Sought healthcare outside the home | Used traditional medicine or consulted a traditional healer for child's final illness |
|----------------|---------------------------------|-----------------------------|---------------------------------------------|-----------------|-----------------------------|-------------------------------------------------------------|------------------------------------|---------------------------------------------------------------------------------------|
| 28             | IDI                             | 1-4 years                   | Mother                                      | Home            | Unknown                     | 3                                                           | No                                 | Yes                                                                                   |
| 29             | IDI                             | 1-4 years                   | Mother                                      | Health facility | Acute respiratory infection | 4                                                           | Yes                                | Yes                                                                                   |
| 30             | IDI                             | 1-4 years                   | Mother                                      | Health facility | Acute respiratory infection | 3                                                           | Yes                                | Yes                                                                                   |
| 31             | IDI                             | 1-11 months                 | Mother                                      | Home            | Unknown                     | 2                                                           | Yes                                | Yes                                                                                   |
| 32             | IDI                             | 1-4 years                   | Mother                                      | Home            | HIV/AIDS related death      | 1                                                           | Yes                                | No                                                                                    |
| 33             | IDI                             | 1-11 months                 | Mother                                      | On route        | Diarrhoeal disease          | 5                                                           | No                                 | Yes                                                                                   |
| 34             | FGD                             | 1-11 months                 | Grandmother                                 | Home            | Unknown                     | 5                                                           | Yes                                | No                                                                                    |
| 35             | FGD                             | 1-11 months                 | Mother                                      | On route        | Diarrhoeal disease          | 5                                                           | Yes                                | No                                                                                    |
| 36             | FGD                             | 1-4 years                   | Grandmother                                 | Health facility | Severe malnutrition         | 2                                                           | Yes                                | No                                                                                    |
| 37             | FGD                             | 1-11 months                 | Mother                                      | Home            | Diarrhoeal disease          | 5                                                           | Yes                                | Yes                                                                                   |
| 38             | FGD                             | 1-4 years                   | Mother                                      | Home            | Meningitis or encephalitis  | 5                                                           | Yes                                | No                                                                                    |

\*This participant did not use traditional medicines or consult a traditional healer, but went to consult "prophets" (considered faith-based healers)

\*\* The respondent was a traditional healer

<sup>†</sup> IDI - In-depth Interview; FGD - focus group discussion
